## Bioenergetics and diving activity of internesting leatherback turtles *Dermochelys coriacea* at Parque Nacional Marino Las Baulas, Costa Rica

Bryan P. Wallace<sup>1,\*</sup>, Cassondra L. Williams<sup>2</sup>, Frank V. Paladino<sup>2</sup>, Stephen J. Morreale<sup>3</sup>,  
R. Todd Lindstrom<sup>4,†</sup> and James R. Spotila<sup>1</sup>

<sup>1</sup>Drexel University, Department of Bioscience and Biotechnology, 3141 Chestnut Street, Philadelphia, PA 19104 USA, <sup>2</sup>Indiana-Purdue University, Department of Biology, 2101 E. Coliseum Blvd, Fort Wayne, IN 46805 USA,

<sup>3</sup>Cornell University, Department of Natural Resources, Ithaca, NY 14853 and <sup>4</sup>Lotek Wireless, Inc., St John's, Newfoundland, Canada A1C 1Z8

\*Author for correspondence at present address: Duke University Marine Laboratory, Nicholas School of Environmental and Earth Sciences, 135 Duke University Marine Lab Road, Beaufort, NC 28516, USA (e-mail: bwallace@duke.edu)

†Present address: Ocean Touch Instrumentation Ltd, 86 Cherry Lane, Conception Bay South, NL, Canada A1W 3B3

Accepted 25 August 2005

### Summary

Physiology, environment and life history demands interact to influence marine turtle bioenergetics and activity. However, metabolism and diving behavior of free-swimming marine turtles have not been measured simultaneously. Using doubly labeled water, we obtained the first field metabolic rates (FMRs;  $0.20\text{--}0.74\text{ W kg}^{-1}$ ) and water fluxes ( $16\text{--}30\%$  TBW  $\text{day}^{-1}$ , where TBW=total body water) for free-ranging marine turtles and combined these data with dive information from electronic archival tags to investigate the bioenergetics and diving activity of reproductive adult female leatherback turtles *Dermochelys coriacea*. Mean dive durations ( $7.8\pm 2.4\text{ min}$  ( $\pm 1\text{ S.D.}$ ), bottom times ( $2.7\pm 0.8\text{ min}$ ), and percentage of time spent in water temperatures ( $T_w \leq 24^\circ\text{C}$  ( $9.5\pm 5.7\%$ )) increased with increasing mean maximum dive depths ( $22.6\pm 7.1\text{ m}$ ; all  $P \leq 0.001$ ). The FMRs increased with longer mean dive durations, bottom times and surface intervals and increased time spent in  $T_w \leq 24^\circ\text{C}$  (all  $r^2 \geq 0.99$ ). This

suggests that low FMRs and activity levels, combined with shuttling between different water temperatures, could allow leatherbacks to avoid overheating while in warm tropical waters. Additionally, internesting leatherback dive durations were consistently shorter than aerobic dive limits calculated from our FMRs ( $11.7\text{--}44.3\text{ min}$ ). Our results indicate that internesting female leatherbacks maintained low FMRs and activity levels, thereby spending relatively little energy while active at sea. Future studies should incorporate data on metabolic rate, dive patterns, water temperatures, and body temperatures to develop further the relationship between physiological and life history demands and marine turtle bioenergetics and activity.

Key words: leatherback turtle, *Dermochelys coriacea*, bioenergetics, field metabolic rate, diving physiology.

### Introduction

Physiology, environment and life history constrain animal energetics and behavior. Marine turtles are attractive subjects for investigation of trade-offs between physiological constraints, life history demands and activity levels because they play several important ecological roles (Bjorndal and Jackson, 2003), migrate long distances between distinct foraging and reproductive areas (Plotkin, 2003) and are long-lived and iteroparous (Miller, 1997). At-sea metabolic rates for marine turtles are the most critical components in calculating individual and population energy requirements, improving our understanding of physiological limitations on diving and thermoregulation, and for refinement of demographic parameters necessary to estimate population trends (Jones et al., 2004). However, concurrent measurements of metabolism and diving activity of free-swimming marine turtles have not yet been documented.

Leatherback turtles *Dermochelys coriacea* Vandelli 1761 are critically endangered (Spotila et al., 2000) and range circumglobally from sub-polar to tropical waters (Goff and Lien, 1988; Paladino et al., 1990). Their unique thermoregulatory adaptations (Frair et al., 1972; Greer et al., 1973; Paladino et al., 1990), pan-oceanic migrations (Morreale et al., 1996; Hays et al., 2004a,b; Ferraroli et al., 2004), prodigious growth rate (Zug and Parham, 1996), reproductive output (Reina et al., 2002b) and size (200–900 kg) make quantification and understanding of the energy–activity trade-offs of the species' distinctive physiology, movements, and life history crucial to their conservation.

Leatherbacks utilize gigantothermy – a suite of physiological adaptations including low metabolic rate, large thermal inertia, blood flow adjustments and peripheral insulation – to maintain elevated body temperatures in cold

water and avoid overheating in the tropics (Paladino et al., 1990). Such thermal tolerance probably allowed leatherbacks to exploit an ecological niche unavailable to other marine turtle species, similar to the thermal niche expansion theory proposed by Block et al. (1993) to explain the multiple and diverse origins of endothermy in the Family Scombroidei (tunas, billfish). Leatherback metabolic rate (MR) during nesting is intermediate between reptilian and mammalian resting metabolic rates (RMRs) scaled to leatherback size (Paladino et al., 1990, 1996). However, all metabolic measurements have been on adult leatherbacks during nesting, walking on the beach, or while restrained in nets (Lutcavage et al., 1990, 1992; Paladino et al., 1990, 1996), and not during in-water activities that constitute the vast majority of the lifespan of adult leatherbacks. Therefore, quantification of metabolic rates for free-swimming leatherbacks would provide ecologically relevant measures of energy expenditure during at-sea activity.

The energetic costs of activity and maintenance physiological processes during the internesting period are unknown. Internesting leatherbacks swim continuously, displaying distinct swim-speed patterns for diving and traveling (Eckert, 2002; Reina et al., 2005; Southwood et al., 2005), in contrast to hypotheses that turtles rest or bask for extended periods at or near the surface (Eckert et al., 1986, 1989; Southwood et al., 1999). Leatherbacks exhibit distinct dive patterns during different activities. For instance, U-shaped dives, during which turtles decrease activity on or near the ocean bottom, are thought to serve a resting or energy conservation purpose, in contrast to V-shaped dives, which appear to serve mainly a transit purpose (Reina et al., 2005). Southwood et al. (1999) hypothesized that leatherback metabolism at sea might be higher than during oviposition due to other costs (reproduction, swimming, foraging, etc.); however, swimming in other vertebrates is more energetically efficient than walking (Schmidt-Nielsen, 1972) and elevated water temperatures in the tropics might constrain leatherback activity due to the possibility of overheating, as reported for giant bluefin tuna (Blank et al., 2004). Furthermore, given the competing reproductive energy requirements of round-trip migration between foraging and nesting grounds, egg production and nesting, and internesting activity at sea, leatherbacks should conserve energy while at sea during the internesting period in order to enhance their seasonal reproductive success.

Aerobic dive limit (ADL) can provide estimates of physiological and energetic constraints on activity in air-breathing, diving animals (Costa et al., 2001). The ADL concept specifically refers to the dive duration beyond which blood lactate levels increase above resting levels (Kooyman et al., 1980). However, direct measurements of post-dive blood lactate concentrations are difficult to obtain from free-swimming animals, so many reports combine data on individual total oxygen stores and at-sea metabolic rates to obtain calculated aerobic dive limits (cADL; for a review, see Costa et al., 2001). Leatherback respiratory and cardiovascular physiology allows for deep and prolonged diving (Lutcavage et al., 1990; Paladino et al., 1996), with the deepest recorded dive

to 1230 m (Hays et al., 2004b) and the longest dive duration in excess of 1 h (Southwood et al., 1999). Lutcavage et al. (1992) combined measurements of nesting leatherback metabolic rates, blood O<sub>2</sub>-carrying capacity and tissue myoglobin concentration (Lutcavage et al., 1990) with data on blood and lung volumes to calculate total O<sub>2</sub> stores of 27 ml kg<sup>-1</sup>, and estimated that leatherback cADL was between 5–70 min. Southwood et al. (1999) recorded the longest dive duration for a leatherback (67.3 min) and refined the cADL estimate to 33–67 min, based on heart rates and dive patterns of free-swimming adult female leatherbacks during the internesting period. In order to better estimate the cADL, however, measurements of metabolic rates of free-swimming leatherbacks are necessary.

Using conventional respirometry to measure metabolic rates of free-ranging marine animals is logistically infeasible in most cases. However, the doubly labeled water (DLW) method has proved a useful tool for studying field energetics and diving activity of marine animals (Costa, 1988; Arnould et al., 1996; Costa and Gales, 2000, 2003). The DLW method estimates CO<sub>2</sub> production (rCO<sub>2</sub>) from the divergence between washout curves of hydrogen (deuterium, D or tritium, T) and oxygen (18-oxygen, <sup>18</sup>O) isotopes introduced into an animal's total body water (Lifson et al., 1955). Disadvantages of the method include the high cost of the isotopes and the reliance of the method on significant divergence of the isotope washout curves that is created by a relatively higher rCO<sub>2</sub> than water turnover rate (rH<sub>2</sub>O). The accuracy of the DLW method decreases considerably as the ratio of rCO<sub>2</sub> to rH<sub>2</sub>O decreases (Butler et al., 2004). Although the DLW method has been used to measure the field metabolic rate (FMR) and water turnover of many terrestrial reptilian species (for a review, see Speakman, 1997), Booth (2002) concluded that DLW would not work for aquatic turtles because their water turnover rates are too high (approximately 1.6–4.3×TBW day<sup>-1</sup>, where TBW=total body water). Clusella Trullas et al. (in press) recently reported DLW-derived FMRs and water turnover rates during dispersal in hatchling olive ridley turtles *Lepidochelys olivacea*, but there are no published reports of DLW being used to quantify the FMRs of free-swimming adult marine turtles. However, since marine turtles face a different osmoregulatory challenge from freshwater turtles, and osmoregulate efficiently (Reina, 2000; Reina et al., 2002a), they should have a lower water turnover rate than their freshwater counterparts and sufficient divergence in the isotopes should occur to allow measurement of FMRs in this species.

Therefore, using highly enriched DLW, we measured for the first time the FMRs and water turnover rates for free-swimming adult marine turtles and used electronic archival tags to record diving activity of 18 adult female leatherbacks during the internesting period. Here we combine metabolic and diving data to examine relationships between physiology, environment and activity in leatherbacks.

### Materials and methods

We conducted this study at Playa Grande, Parque Nacional

Marino Las Baulas (PNMB), Costa Rica. We performed the DLW experiment on five turtles *Dermochelys coriacea*, two in 2002 and three more in 2003–2004. First, we weighed the turtles using a tripod, winch, cargo net and hanging scale (Chatillon, Largo, FL, USA; 500±2 kg capacity). Next, we took initial blood samples (5–20 ml) from the dorsal cervical sinus (Owens and Ruiz, 1980) for determination of background D and  $^{18}\text{O}$  levels. We then intravenously injected 15–30 ml  $\text{D}_2^{18}\text{O}$  [99 APE (atom percent excess)  $\text{D}_2$  and 75 APE  $^{18}\text{O}$  solution; Isotec, Inc., Miamisburg, OH, USA] into the dorsal cervical sinus in order to ensure rapid equilibration of the isotopes in the turtles' body water (Speakman, 1997). We used equation 12.1 from Speakman (1997) to estimate the DLW dosages required for leatherbacks within the range of body sizes we studied. In 2002–2003, we only had approximately 30 g of the DLW available, so we took a conservative approach to the use of our expensive labeled water. Due to the highly exploratory nature of this study, we decided to divide the DLW we had into two doses and attempt the experiment on two turtles, rather than putting all of the DLW into one turtle. This

way we avoided the risk that that turtle would not return to nest, in which case, we would have had no possibility of obtaining any results. In the 2003–2004 season we adhered closely to the Speakman (1997) equation.

We sampled blood ( $\leq 5$  ml) hourly from a rear flipper to establish equilibration of the isotopes with body water and released the turtles after approximately 4 h. Subsequent analyses confirmed that the injected isotopes had equilibrated with the animals' body water in this time period, as indicated by the stable plateau of isotopic enrichments between 2–4 h after injection of isotopes (Fig. 1). A recent DLW study on Atlantic walrus (body mass=1310 kg; ~5 times the body mass of the leatherbacks in our study) reported that the isotopes (intravenous injection) equilibrated in 2.5–3 h (Aquarone, 2004).

Because the DLW method requires recapture to measure final plasma isotope levels, and female leatherbacks at PNMB nest on average 6–8 times in a season (Reina et al., 2002b), we selected female turtles that were early in their nesting season (first to fourth nest), to ensure return and recapture upon subsequent nesting. We took a final blood sample ( $\leq 5$  ml) from a rear flipper and albumen samples from shelled albumen gobs (SAGs; Wallace et al., 2004) when the turtles returned to nest in order to measure final isotope concentrations remaining in turtle body water at the end of the study period. While recent blood biochemistry analyses on reptiles indicate more variability in samples taken from hind limbs than from jugular veins (Jacobson et al., [http://accstr.ufl.edu/blood\\_chem.htm](http://accstr.ufl.edu/blood_chem.htm)), we found that isotopic concentrations in samples taken from the hind flippers were similar to those from the cervical sinus. We sampled mainly from a rear flipper because it was a less invasive procedure and we only needed small volumes of blood. All blood and albumen samples were later analyzed for  $\text{D}_2$  and  $^{18}\text{O}$  isotope concentrations by Metabolic Solutions, Inc. (Nashua, NH, USA), which ensures the accuracy of their analyses to 2% of 1 S.D. for deuterium and 0.4% of 1 S.D. for  $^{18}\text{O}$ .

We calculated total body water (TBW) from oxygen dilution space and water turnover ( $\text{rH}_2\text{O}$ ) using TBW derived from deuterium dilution space (Speakman, 1997). We calculated  $\text{CO}_2$  production ( $\text{rCO}_2$ ) assuming an RQ of 0.7 for nesting leatherbacks (Paladino et al., 1996) and using a 2-pool equation 7.43 from Speakman (1997), recommended for large animals.

We used LTD (light–temperature–depth) 2310 archival tags (Lotek Wireless, Inc., Newfoundland, Canada) attached to the anterior portion of the pygal process (Morreale, 1999) of 18 turtles, four of which were also subjects of the DLW experiments, to record their diving activity. The LTDs were programmed to record time, depth, water temperature and light level data at intervals of 4–60 s (depending on the tag) and had a maximum depth rating of 2000 m, with 1% accuracy to full scale. We analyzed dive data using Surface Adjust and Dive Analysis Programs from Lotek Wireless, Inc. To improve the reliability of classifying true surfacing events for the purposes of dive analysis, the automated Surface Adjust program was arbitrarily limited to search within areas of the data containing readings of <10 m when referenced to the daily minimum depth value. This assumes that the zero offset error on any

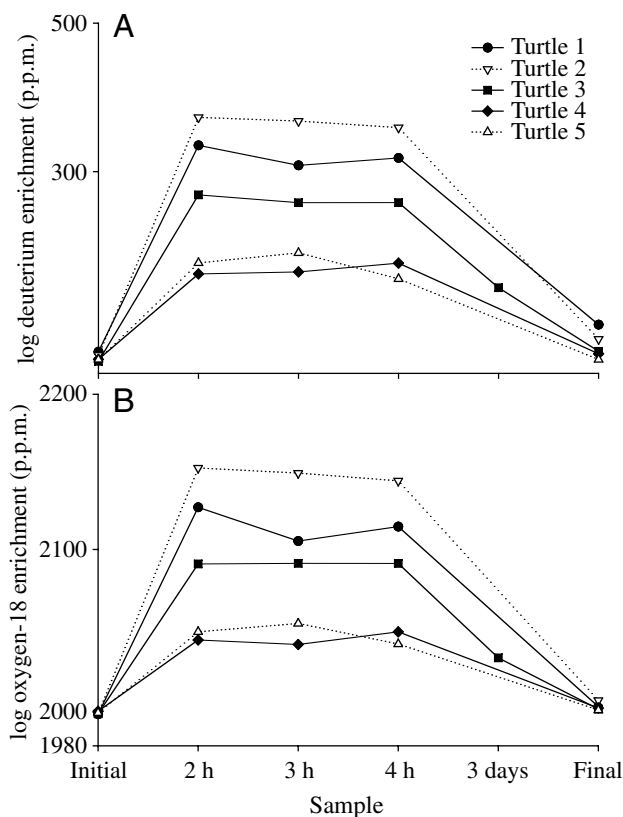

Fig. 1. Log(isotopic enrichment values) for (A) deuterium and (B) oxygen-18 for five leatherback turtles. The filled circle, square and diamond with solid lines represent the isotopic enrichments and washouts for the three turtles for which we were able to calculate FMRs. Open triangles and dotted lines represent the isotopic enrichments and washouts for the two turtles for which we were unable to calculate FMRs. Note the 3-day values for Female 3, which allowed for calculation of an FMR for the first 3 days of her interesting period and an FMR for her entire interesting period.

given day will be not fluctuating by more than 10 m. Regions of data that met this condition were processed and the median depth values determined as estimates of the zero offset error. The zero offset error for a given dive was then calculated by averaging the median value from the surface events that preceded and followed each dive.

Once the depth data were adjusted based on the zero offset, the entire data set was processed by Dive Analysis, which classified surfacing events as those regions of the data where the corrected depth records were exactly zero. We further filtered the adjusted data and accepted only dives >3 m to limit our analyses to true diving events. We calculated bottom time as the portion of a dive at or below 85% of maximum depth. A dive was counted as a U-dive if the turtle spent ≥1 min on the ‘bottom’ (Reina et al., 2005). Based on video footage of breathing episodes at the surface (Reina et al., 2005), and because extended surface intervals correspond to traveling periods near the surface, not necessarily breathing or basking (Eckert, 2002), we only included surface events of >12 s and ≤20 min in calculation of post-dive surface intervals. We excluded less than 6% of all surface intervals using these criteria.

We used least-squares linear regressions to analyze relationships between mean dive variables and Student’s *t*-tests to compare dive variables between treatment groups (DLW vs LTD turtles; SPSS 11.5.1, Chicago, USA), and accepted significance at *P*=0.05 level. We arcsine transformed percentage data and values are presented as means ± 1 S.D. unless otherwise noted. We conducted all procedures under permits 288-2002-OFAU and 273-2003-OFAU from the Costa Rican Ministerio del Ambiente y Energía (MINAE) and Drexel University IACUC Approval 02183 and 02185.

Results

Field metabolic rates and water turnover rates

We measured four FMRs for three free-ranging interesting

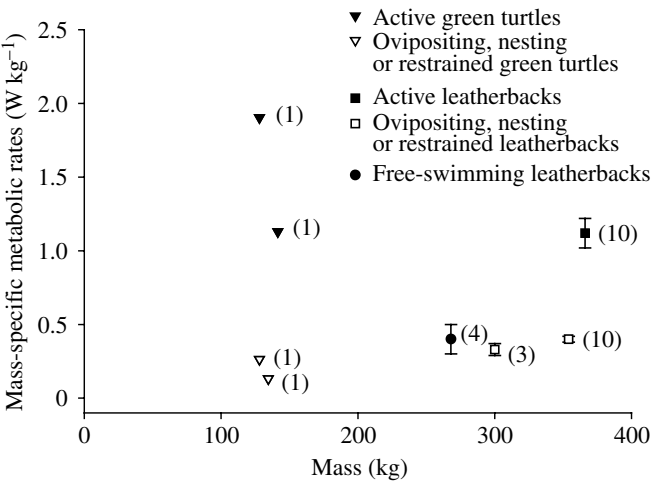

Fig. 2. Mass-specific metabolic rates of adult female leatherback and green turtles. The field metabolic rates reported in this study for interesting leatherbacks (filled circle) were similar to metabolic rates measured during oviposition, nest construction or restraint for leatherbacks (open squares; Paladino et al., 1990, 1996) and slightly higher than those for green turtles (open inverted triangles; Prange and Jackson, 1976; Jackson, 1985). The FMRs were lower than metabolic rates measured during vigorous nest covering or walking along the beach for green turtles (filled inverted triangles; Prange and Jackson, 1976; Jackson, 1985) and leatherbacks (filled square; Paladino et al., 1990, 1996). Values are means ± 1 S.E.M.; numbers in parentheses indicate sample size.

leatherbacks (Table 1). We obtained two FMRs for Female 3, one for the first 3 days of her interesting period, and one for her entire 14 day period. This turtle came ashore and attempted to nest after 3 days but did not lay any eggs, and we obtained a blood sample at that point. The turtle’s field metabolic rates (FMRs) and diving behavior were similar to those of the other turtles (Tables 1 and 2). The FMRs for the three turtles (range: 0.20–0.74 W kg<sup>-1</sup>) were similar to MRs for nesting female leatherbacks and slightly higher than MRs of nesting green

Table 1. Mass, water turnover rates, and field metabolic rates of adult female leatherback turtles

| Turtle     | Mass (kg) | Study duration (days) | N <sub>O</sub> (O <sup>18</sup> dilution space; mol) | %TBW (O <sup>18</sup> ) | k <sub>D</sub> :k <sub>O</sub> | ml H <sub>2</sub> O day <sup>-1</sup> | %TBW day <sup>-1</sup> | FMR (W kg <sup>-1</sup> ) | Reptilian RMR <sup>1</sup> (W kg <sup>-1</sup> ) | Mammalian RMR <sup>2</sup> (W kg <sup>-1</sup> ) |
|------------|-----------|-----------------------|------------------------------------------------------|-------------------------|--------------------------------|---------------------------------------|------------------------|---------------------------|--------------------------------------------------|--------------------------------------------------|
| 1          | 270       | 14.7                  | 10275                                                | 68.5                    | 0.70                           | 28696                                 | 15.5                   | 0.74                      | 0.146                                            | 0.826                                            |
| 2          | 196       | 11.2                  | 7976                                                 | 73.3                    | 1.04                           | 39391                                 | 27.2                   | ND                        | 0.154                                            | 0.895                                            |
| 3          | 268       | 14.1                  | 11036                                                | 74.1                    | 0.86                           | 45825                                 | 21.5                   | 0.40                      | 0.146                                            | 0.828                                            |
| 3 (3 days) | 268       | 3.1                   | 11036                                                | 74.1                    | 0.92                           | 62465                                 | 29.9                   | 0.24                      | 0.146                                            | 0.828                                            |
| 4          | 308       | 12.8                  | 14105                                                | 82.4                    | 0.93                           | 58408                                 | 23.6                   | 0.20                      | 0.143                                            | 0.800                                            |
| 5          | 298       | 12.7                  | 11402                                                | 68.9                    | ND                             | ND                                    | ND                     | ND                        | 0.144                                            | 0.806                                            |
| Mean       | 268       |                       |                                                      | 73.9                    |                                |                                       | 23.5                   | 0.40                      | 0.147                                            | 0.830                                            |
| S.D.       | 44        |                       |                                                      | 5.7                     |                                |                                       | 5.5                    | 0.20                      |                                                  |                                                  |

We obtained four FMRs for three leatherback turtles during the interesting period (one for the first 3-day interval and one for the entire 14-day interval for Turtle 3).

Leatherback FMR values are intermediate between allometric predictions of resting metabolic rates (RMRs) for reptiles<sup>1</sup> (RMR=0.378M<sub>b</sub><sup>-0.17</sup>) and mammals<sup>2</sup> (RMR=3.35M<sub>b</sub><sup>-0.25</sup>; equations from Paladino et al., 1990, 1996).



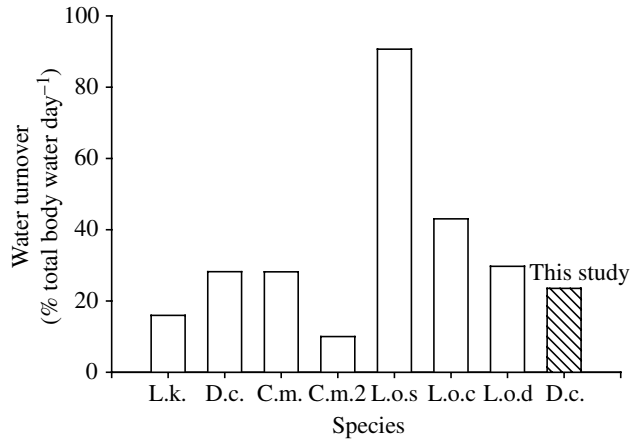

Fig. 3. Water turnover rates (% TBW day<sup>-1</sup>) for marine turtles. Water turnover rates measured by DLW in this study (mean=24% TBW day<sup>-1</sup>, range=16–30% TBW day<sup>-1</sup>) are within the range of published values for marine turtles. x-axis labels from left to right, with the method by which water turnover rates were derived: L.k., *Lepidochelys kempii* adults, deuterated water (D<sub>2</sub>O) (Ortiz et al., 2001); D.c., *D. coriacea* hatchlings, lachrymal gland secretions (Reina et al., 2002b); C.m.1, *C. mydas* hatchlings, lachrymal gland secretions (Reina, 2000); C.m.2, *C. mydas* juveniles, DLW (Jones et al., in press); L.o., *Lepidochelys olivacea* hatchlings (s, swimming, c, crawling, d, digging) DLW (Clusella Trullas et al., in press); D.c. (striped bar): *D. coriacea* adults, DLW, this study.

turtles *Chelonia mydas* obtained by analyses of respiratory gases during oviposition (Fig. 2). We were unable to measure FMRs for two of the study turtles (Females 2 and 5).

Calculated total body water (TBW) for five study female leatherbacks (ranging in mass from 196 to 308 kg) was 73.9±5.7% (range: 68.5–82.4%; Table 1). Water turnover rates (rH<sub>2</sub>O) of internesting leatherbacks (including the rH<sub>2</sub>O during the 3-day interval for Turtle 3) ranged from 16% to 30% of TBW day<sup>-1</sup> (mean: 24±5.5% TBW day<sup>-1</sup>), which were within the range of published rH<sub>2</sub>O values for leatherbacks and other species of marine turtles (Fig. 3). Female 2 exhibited the highest rH<sub>2</sub>O for her entire 11-day internesting period (27.2% TBW day<sup>-1</sup>), while Female 3 had a higher rH<sub>2</sub>O during the first 3 days of her internesting period (29.9% TBW day<sup>-1</sup>).

#### Diving activity during the internesting period

We recorded diving activity of four of five DLW turtles and 14 'control' (LTD) turtles, totaling 23 402 total dives. Individual turtles demonstrated different diving patterns in terms of mean dive variables and water temperature  $T_w$  (Table 2). Across all turtles, mean maximum dive depth was 22.6±7.1 m, with mean dive depth 14.6±4.6 m and mean dive duration 7.8±2.4 min. The deepest single dive was 200 m (Turtle 16) and the longest was 44.9 min (Turtle 2). Turtles reached maximum depths of ≤20 m on approximately 60% of all dives, and approximately 43% of all dive durations were ≤5 min. The mean water temperature leatherbacks encountered was 26.6°C, while the minimum encountered was 13.6°C (Turtle 16).

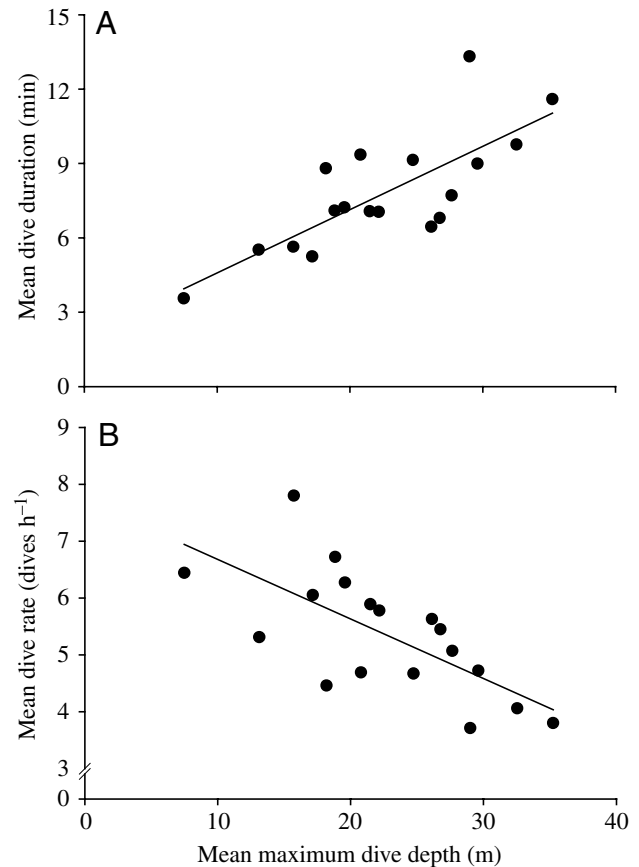

Fig. 4. Mean maximum dive depth vs (A) mean dive duration and (B) mean dive rate for internesting leatherback turtles. Increases in mean maximum dive depth resulted in increased mean dive durations (A;  $y=2.033+0.2553x$ ,  $r^2=0.588$ ,  $P<0.001$ ) and decreases in mean dive rates (B;  $y=7.727-0.1048x$ ,  $r^2=0.469$ ,  $P=0.002$ ) of 18 adult female leatherbacks.

Including all dives for all turtles, post-dive surface intervals increased as the duration of the preceding dive increased (Spearman Rank Correlation,  $r^2=0.159$ ,  $P<0.001$ ). As mean maximum depth increased for all turtles, mean dive duration ( $r^2=0.588$ ,  $P<0.001$ ; Fig. 4A), mean bottom time ( $r^2=0.590$ ,  $P<0.001$ ), and proportion of U-dives ( $r^2=0.750$ ,  $P<0.001$ ) increased while mean dive rate decreased ( $r^2=0.469$ ,  $P=0.002$ ; Fig. 4B). Additionally, increased mean maximum depth resulted in turtles spending an increased proportion of time in  $T_w \leq 24^\circ\text{C}$  ( $r^2=0.424$ ,  $P=0.003$ ); a stronger relationship existed with percentage of time spent in  $T_w \leq 20^\circ\text{C}$  ( $r^2=0.595$ ,  $P<0.001$ ).

Turtles with LTDs attached that underwent DLW experiments had significantly longer internesting periods than turtles that only had LTDs attached (Student's  $t$ -test:  $t_{17}=7.951$ ,  $P<0.001$ ; DLW turtles: 13.1±1.4 days, LTD turtles: 9.1±0.8 days). Additionally, DLW turtles spent a significantly higher proportion of time in  $T_w \leq 24^\circ\text{C}$  than LTD turtles ( $t_{16}=3.165$ ,  $P=0.006$ ; DLW: 16.0±2.6%, LTD: 7.6±5.0%), especially during the early phase of the internesting period, which directly followed nesting and the restraint portion of the experiment

( $t_{16}=3.508$ ,  $P=0.003$ ; DLW:  $25.5\pm4.5\%$ , LTD:  $10.4\pm6.9\%$ ). Furthermore, DLW turtles made significantly more total dives ( $t_{16}=3.325$ ,  $P=0.004$ ; DLW:  $1671\pm324$ , LTD:  $1194\pm233$ ), and particularly more U-dives during the internesting period than LTD turtles ( $t_{16}=5.125$ ,  $P<0.001$ ; DLW:  $1206\pm242$ , LTD:  $750\pm130$ ).

#### *FMRs, diving physiology and activity*

Although we had a small sample size, (1 FMR for Turtles 1 and 4, 2 FMRs for Turtle 3), we used statistical analyses (Pearson Product-Moment Correlation) to examine the relationships between FMR, diving physiology and activity. We found several suggestive of strong positive relationships between FMRs and mean dive durations ( $r^2=0.991$ ), bottom times ( $r^2=0.992$ ), percentage of time spent in  $T_w\leq 24^\circ\text{C}$  ( $r^2=0.990$ ), and surface interval ( $r^2=0.999$ ,  $P=0.027$ ).

Combining the FMRs acquired by us with the value for adult

leatherback total  $\text{O}_2$  stores reported by Lutcavage et al. (1992), cADLs for interesting female leatherbacks were between 11.7 min and 44.3 min (Table 3A).

#### **Discussion**

Free-swimming leatherbacks have low internesting metabolic rates, and thus spend little energy while active at sea between nesting events. The DLW-derived FMRs that we measured for free-swimming, internesting leatherbacks were similar to leatherback MRs measured during restraint on the beach, oviposition or nest chamber construction, and lower than leatherback MRs obtained by analyses of respiratory gases during vigorous nest-covering and walking on the beach (Paladino et al., 1990, 1996). In addition, our data are consistent with the findings of Southwood et al. (1999), who reported that diving heart rates of leatherbacks were more

Table 2. Dive variables for interesting female leatherback turtles at Parque Nacional Marino Las Baulas, Costa Rica, 2002-03 and 2003-04

| Turtle             | Treatment | Period (days)     | Total dives       | Total U-dives     | Total V-dives | Duration (min) | Mean dive variables    |           |                   |                               |                   |                                      |
|--------------------|-----------|-------------------|-------------------|-------------------|---------------|----------------|------------------------|-----------|-------------------|-------------------------------|-------------------|--------------------------------------|
|                    |           |                   |                   |                   |               |                | Surface interval (min) | Depth (m) | Maximum depth (m) | Rate (dives $\text{h}^{-1}$ ) | Bottom time (min) | % Time in $T_w\leq 24^\circ\text{C}$ |
| 1                  | DLW/LTD   | 14.7              | 1652              | 1321              | 331           | 9.0            | 3.6                    | 19.6      | 29.6              | 4.7                           | 3.4               | 19.0                                 |
| 2                  | DLW/LTD   | 11.2              | 1222              | 860               | 362           | 8.8            | 3.7                    | 12.1      | 18.2              | 4.5                           | 3.2               | 17.0                                 |
| 3                  | DLW/LTD   | 14.1              | 1952              | 1411              | 541           | 7.2            | 2.8                    | 13.0      | 19.6              | 6.3                           | 2.7               | 13.0                                 |
| 3 (3 days)         | DLW/LTD   | 3.1               | 404               | 318               | 86            | 6.8            | 2.5                    | 15.2      | 22.9              | 6.5                           | 2.5               | 14.1                                 |
| 4                  | DLW       | 12.7              | ND                | ND                | ND            | ND             | ND                     | ND        | ND                | ND                            | ND                | ND                                   |
| 5                  | DLW/LTD   | 12.8              | 1856              | 1234              | 622           | 6.8            | 3.0                    | 17.2      | 26.8              | 5.5                           | 2.3               | 15.0                                 |
| Mean (DLW turtles) |           | 13.1 <sup>a</sup> | 1671 <sup>b</sup> | 1207 <sup>c</sup> | 464           | 8.0            | 3.2                    | 15.5      | 23.5              | 5.2                           | 2.9               | 16.0 <sup>d</sup>                    |
| S.D.               |           | 1.4               | 324               | 242               | 140           | 1.1            | 0.4                    | 3.5       | 5.5               | 0.8                           | 0.5               | 2.6                                  |
| 6                  | LTD       | 9.2               | 1044              | 751               | 293           | 9.1            | 3.6                    | 15.7      | 24.7              | 4.7                           | 3.2               | 7.8                                  |
| 7                  | LTD       | 9.0               | 1642              | 874               | 768           | 5.3            | 2.9                    | 10.8      | 17.2              | 6.1                           | 1.7               | 7.2                                  |
| 8                  | LTD       | 9.8               | 1536              | 486               | 1050          | 3.6            | 4.2                    | 4.9       | 7.5               | 6.4                           | 1.3               | 0.2                                  |
| 9                  | LTD       | 8.0               | 1233              | 783               | 450           | 6.5            | 3.0                    | 16.7      | 26.1              | 5.6                           | 2.2               | 10.9                                 |
| 10                 | LTD       | 10.0              | 880               | 742               | 138           | 13.3           | 4.5                    | 17.9      | 29.0              | 3.7                           | 3.7               | 7.1                                  |
| 11                 | LTD       | 7.7               | 984               | 613               | 371           | 7.1            | 4.1                    | 14.2      | 22.2              | 5.8                           | 2.4               | 5.4                                  |
| 12                 | LTD       | 9.0               | 1273              | 972               | 301           | 7.7            | 2.6                    | 17.6      | 27.7              | 5.1                           | 2.7               | 7.9                                  |
| 13                 | LTD       | 8.0               | 1333              | 776               | 557           | 5.6            | 3.1                    | 10.3      | 15.7              | 7.8                           | 2.0               | 1.1                                  |
| 14                 | LTD       | 8.2               | 1302              | 610               | 692           | 5.5            | 3.6                    | 8.2       | 13.1              | 5.3                           | 1.8               | 2.9                                  |
| 15                 | LTD       | 10.0              | 1146              | 853               | 293           | 9.8            | 3.0                    | 21.2      | 32.5              | 4.1                           | 3.7               | 15.7                                 |
| 16                 | LTD       | 9.0               | 791               | 637               | 154           | 11.6           | 3.9                    | 23.0      | 35.2              | 3.8                           | 4.4               | 17.5                                 |
| 17                 | LTD       | 9.9               | 1087              | 836               | 251           | 9.4            | 3.5                    | 14.1      | 20.8              | 4.7                           | 3.6               | 7.7                                  |
| 18                 | LTD       | 9.1               | 1185              | 714               | 471           | 7.1            | 3.4                    | 12.8      | 18.8              | 6.7                           | 2.8               | 10.9                                 |
| 19                 | LTD       | 10.0              | 1284              | 859               | 425           | 7.1            | 3.4                    | 12.9      | 21.5              | 5.9                           | 1.9               | 3.8                                  |
| Mean (LTD turtles) |           | 9.1 <sup>a</sup>  | 1194 <sup>b</sup> | 750 <sup>c</sup>  | 444           | 7.8            | 3.5                    | 14.3      | 22.3              | 5.4                           | 2.7               | 7.6 <sup>d</sup>                     |
| S.D.               |           | 0.8               | 233               | 130               | 253           | 2.6            | 0.5                    | 4.9       | 7.6               | 1.2                           | 0.9               | 5.0                                  |
| Mean (all turtles) |           | 10.1              | 1300              | 852               | 448           | 7.8            | 3.4                    | 14.6      | 22.6              | 5.4                           | 2.7               | 9.5                                  |
| S.D.               |           | 2.1               | 319               | 248               | 229           | 2.4            | 0.5                    | 4.6       | 7.1               | 1.1                           | 0.8               | 5.8                                  |

ND, no data. There were no dive data for Turtle 4 because she did not have a data logger.

DLW/LTD, turtles used for doubly labeled water/data logger experiments; LTD, turtles with only data loggers attached. Data from the 3-day period for Turtle 3 were not included in calculation of means.

Significantly different pairs denoted by common superscript: <sup>a</sup> $P<0.001$ ; <sup>b</sup> $P=0.004$ ; <sup>c</sup> $P<0.001$ ; <sup>d</sup> $P=0.006$ .

similar to heart rates during oviposition than relatively higher heart rates measured during active nest covering or walking on the beach. In a broader context, leatherback FMRs were intermediate between allometric expectations of reptilian and mammalian RMRs (Paladino et al., 1990, 1996; Table 1). The FMRs were slightly higher than the metabolic rates for green turtles during oviposition but lower than the metabolic rates of green turtles during activity (Prange and Jackson, 1976; Jackson, 1985; Fig. 2). These FMRs also indicate that swimming is more energetically efficient than walking for leatherbacks as it is for other vertebrates (Schmidt-Nielsen, 1972).

Adult female leatherbacks in this study exhibited high  $rH_2O$  values (16–30% TBW), but within the range of values for leatherbacks and other marine turtle species obtained with isotopically labeled water (Clusella Trullas et al., in press; Ortiz et al., 2001; Jones et al., in press) and by analyses of lachrymal gland secretion rates (Reina, 2000; Reina et al., 2002a; Fig. 3). The  $rH_2O$  values for female leatherbacks reported here are understandable considering that internesting leatherbacks produce massive egg clutches, which contain large amounts of water. Indeed, the female leatherbacks in this study laid subsequent clutches of approximately 3–8 kg in mass (B. P. Wallace, unpublished data). Moreover,

Table 3. Calculated aerobic dive limits (cADLs), mean and maximum dive durations for leatherback turtles

A

| Turtle     | Mass (kg) | FMR (ml O <sub>2</sub> min <sup>-1</sup> ) | O <sub>2</sub> stores (ml) | cADL (min) | Mean duration (min) | Maximum duration (min) | Ratio of mean duration to cADL | % Dives exceeding cADL |
|------------|-----------|--------------------------------------------|----------------------------|------------|---------------------|------------------------|--------------------------------|------------------------|
| 1          | 270       | 625                                        | 7290                       | 11.7       | 9.0                 | 22.2                   | 0.77                           | 32.3                   |
| 2          | 196       | ND                                         | 5292                       | ND         | 8.8                 | 44.9                   | ND                             | ND                     |
| 3          | 268       | 351                                        | 7236                       | 20.6       | 7.2                 | 22.2                   | 0.35                           | 0.05                   |
| 3 (3 days) | 268       | 233                                        | 7236                       | 31.0       | 6.8                 | 16.4                   | 0.22                           | 0.0                    |
| 4          | 308       | 188                                        | 8316                       | 44.3       | ND                  | ND                     | ND                             | ND                     |
| 5          | 298       | ND                                         | 7992                       | ND         | 6.8                 | 21.0                   | ND                             | ND                     |

Among DLW turtles, mean dive durations were all lower than cADLs, and turtles rarely exceeded their cADLs.

We used total oxygen stores reported by Lutcavage et al. (1992) to calculate O<sub>2</sub> stores for each turtle.

B

| Turtle     | Duration (min) |         | Ratio of mean duration to: |               | % Dives exceeding: |               |
|------------|----------------|---------|----------------------------|---------------|--------------------|---------------|
|            | Mean           | Maximum | cADL=11.7 min              | cADL=44.3 min | cADL=11.7 min      | cADL=44.3 min |
| 1          | 9.0            | 22.2    | 0.77                       | 0.20          | 32.26              | 0             |
| 2          | 8.8            | 44.9    | 0.75                       | 0.20          | 36.66              | 0.08          |
| 3          | 7.2            | 22.2    | 0.62                       | 0.16          | 16.60              | 0             |
| 3 (3 days) | 6.8            | 16.4    | 0.58                       | 0.15          | 12.87              | 0             |
| 4          | ND             | ND      | ND                         | ND            | ND                 | ND            |
| 5          | 6.8            | 21.0    | 0.58                       | 0.15          | 17.89              | 0             |
| 6          | 9.1            | 26.4    | 0.78                       | 0.21          | 33.91              | 0             |
| 7          | 5.3            | 18.3    | 0.45                       | 0.12          | 8.47               | 0             |
| 8          | 3.6            | 27.6    | 0.30                       | 0.08          | 4.43               | 0             |
| 9          | 6.5            | 21.1    | 0.55                       | 0.15          | 17.52              | 0             |
| 10         | 13.3           | 31.0    | 1.14                       | 0.30          | 60.11              | 0             |
| 11         | 7.1            | 30.0    | 0.60                       | 0.16          | 20.43              | 0             |
| 12         | 7.7            | 24.1    | 0.66                       | 0.17          | 23.10              | 0             |
| 13         | 5.6            | 19.2    | 0.48                       | 0.13          | 7.73               | 0             |
| 14         | 5.5            | 25.7    | 0.47                       | 0.12          | 14.75              | 0             |
| 15         | 9.8            | 23.9    | 0.83                       | 0.22          | 47.64              | 0             |
| 16         | 11.6           | 26.6    | 0.99                       | 0.26          | 50.19              | 0             |
| 17         | 9.4            | 29.6    | 0.80                       | 0.21          | 31.65              | 0             |
| 18         | 7.1            | 25.8    | 0.61                       | 0.16          | 21.94              | 0             |
| 19         | 7.1            | 24.6    | 0.60                       | 0.16          | 17.21              | 0             |
| Mean       | 7.8            | 25.3    | 0.66                       | 0.18          | 25.02              | 0             |
| S.D.       | 2.4            | 6.4     | 0.20                       | 0.05          | 15.62              | 0.02          |

Mean dive durations for all turtles in this study were within cADLs (11.7–44.3 min; based on FMRs). Overall, only one dive duration (44.9 min; Turtle 2) exceeded the maximum cADL.

leatherbacks possess highly effective osmoregulatory capabilities that allow them to drink seawater without incurring negative water and ionic balance (Reina et al., 2002b). Turtle 3 exhibited a higher  $rH_2O$  during the first 3 days of her interesting period than for the entire 14 days period (Table 2), which corresponded to the high frequency of water/prey ingestion events during the first few days after nesting reported by Southwood et al. (2005).

#### *Efficacy of DLW method in studies of marine turtle energetics*

While the  $rH_2O$  values for all turtles in this study were within the range of water fluxes for other marine turtles (Fig. 3), we were unable to calculate FMRs for Females 2 and 5 using DLW. Female 2 turned over 27.2% of her TBW daily, or nearly 3 times during her 11-day interesting period, while Female 5 completely washed out the deuterium isotope, also indicating a high  $rH_2O$ . In other studies using isotopically labeled water to calculate  $rH_2O$  values for olive ridley (*Lepidochelys olivacea*; Clusella Trullas et al., in press), Kemp's ridley (*L. kempii*; Ortiz et al., 2001), and green turtles (Jones et al., in press), no animals turned over their TBW more than 2.5 times during the study period. Apparently, there exists a threshold ratio of  $rCO_2$  to  $rH_2O$  (where  $rH_2O$  must be  $<27.2\%$  TBW day<sup>-1</sup>) necessary for the DLW method to be able to measure  $rCO_2$  in leatherbacks and perhaps marine turtles in general.

Validation experiments of the accuracy of the DLW method have been performed for several animal species over a wide size range (reviewed in Speakman, 1997). Performing simultaneous metabolic measurements (DLW and respirometry, for example) on adult marine turtles is extremely difficult, due to factors such as their marine lifestyle, large size, endangered status, and the high cost of the large volume of enriched DLW required. In general, validations indicate that although individual variation might account for serious discrepancies between DLW measurements and those acquired by reference methods, the DLW method tends to overestimate  $rCO_2$  by less than 5% among different animal clades (Butler et al., 2004). Only one truly simultaneous validation study has been performed for marine turtles to date, which reported that the global mean of DLW-derived  $rCO_2$  values for juvenile green turtles was not significantly different and only varied by 5.2% from that obtained by gas respirometry for the same period from the same animals (Jones et al., in press).

A ratio of deuterium to oxygen-18 isotopic washout ( $k_D:k_O$ ) that exceeds 0.9 implies that ~90% of oxygen elimination is tied to water losses, and therefore the DLW method might not accurately quantify  $CO_2$  production (Speakman, 1997). In this study, the combination of long study durations, high  $rH_2O$ s and low metabolic rates resulted in insufficient divergence (Female 2;  $k_D:k_O=1.04$ ) or complete washout (Female 5) of the isotopes, rendering the DLW method unable to calculate  $rCO_2$  (Butler et al., 2004) for these two leatherbacks. The other  $k_D:k_O$  ratios that we calculated ranged from 0.70–0.93, slightly above or within the recommended range (Speakman, 1997). The relatively high water turnover rates and  $k_D:k_O$  ratios that we

measured indicate the need for caution when interpreting our results (Speakman, 1997; Butler et al., 2004). However, Jones et al. (in press) reported  $k_D:k_O$  ratios between 0.84–0.92 for juvenile green turtles, and the DLW-derived MRs were not significantly different from MRs obtained by respirometry in that study. Considering existing DLW validation information (Jones et al., in press) and the fact that our FMRs fell within the range of measured MRs for leatherbacks during various activities (Paladino et al., 1990, 1996), we conclude that our measurements were accurate and biologically realistic, despite the lack of simultaneous validation data *via* respirometry.

#### *Interesting diving activity*

Dives tended to be shorter and shallower for Pacific Costa Rican leatherbacks (mean durations  $\approx 7$ –8 min, mean depths  $\approx 15$ –19 m; Southwood et al., 1999, 2005; this study) than dives for leatherbacks in the Caribbean near St Croix (mean durations  $\approx 10$ –15 min, mean depths  $\approx 60$ –100 m; Eckert et al., 1986, 1989; Eckert, 2002). Dive variables from leatherbacks in the South China Sea off Malaysia were intermediate (mean durations  $\approx 8$ –12 min, mean depths  $\approx 26$ –45 m; Eckert et al., 1996). These differences were probably due to relatively shallower depths available to interesting leatherbacks on the continental shelf near PNMB, Costa Rica, relative to other sites (Morreale, 1999; Southwood et al., 1999). Increasing mean maximum dive depths were associated with increased mean dive duration and decreased mean dive rates (Fig. 4), similar to trends reported for leatherbacks worldwide (Eckert et al., 1986, 1996; Southwood et al., 1999; Reina et al., 2005). Similar trends were reported for New Zealand sea lions *Phocarctos hookeri* (Costa and Gales, 2000) and Australian sea lions *Neophoca cinerea* (Costa and Gales, 2003). Therefore, while leatherback diving activity patterns appear to be constrained primarily by different depths encountered in different interesting habitats (Eckert et al., 1996; Morreale, 1999; Southwood et al., 1999), some general patterns in dive behavior exist globally between and among taxa of diving animals.

We found that post-dive surface intervals lengthened with increased dive duration for all dives across all turtles, contrary to some findings (Eckert et al., 1989, 1996; Southwood et al., 1999; but see Reina et al., 2005). However, this relationship had a low  $r^2$  value (0.159), indicating  $>80\%$  of the variance in post-dive surface interval durations that was not explained simply by preceding dive durations. Given the relatively short dive durations and surface intervals of leatherbacks in this study, turtles were probably not using the post-dive surface interval to recover from  $CO_2$  accumulation during diving apnea.

Leatherbacks occasionally exhibited extremely long surface intervals (maxima 21.8–108.3 min). These long surface intervals represented periods of traveling within the upper few meters of the water column, and not resting or basking behavior, as previously hypothesized (Eckert et al., 1986, 1989; Southwood et al., 1999). This is supported by swim speed and location data off Playa Grande (Southwood et al.,



2005) and St Croix (Eckert, 2002) and video footage (Reina et al., 2005) for internesting leatherbacks. Moreover, Penick (1996) measured minimal blood flow to the carapace surfaces of nesting leatherbacks, indicating that leatherbacks would have limited ability for heat gain while basking.

Leatherbacks that had undergone the experimental handling required by the DLW methodology had significantly longer internesting periods, made significantly more U-dives, and spent more time in  $T_w \leq 24^\circ\text{C}$  than leatherbacks to which we only attached data loggers. This was especially evident during the early third of the internesting period. Corticosteroid hormone concentrations increase in response to stress related to prolonged handling (Gregory and Schmid, 2001), and this can inhibit various physiological functions, including egg production (Owens, 1997; Rostal et al., 2001; Milton and Lutz, 2003). Such hormonal inhibition of reproductive function would account for the extended internesting period of the DLW turtles (13.1 days) relative to the LTD turtles (9.1 days). Turtle 3 re-emerged 3 days after nesting, which was probably another manifestation of the hormonal inhibition of the natural egg production process during the internesting period in response to this prolonged stress. This turtle went through the entire nesting process, but did not lay eggs. Although this was a rare occurrence in this population, the turtle's field metabolic rates (FMRs) were similar to the others we obtained (Table 1) and her diving behavior was similar to the behavior of other turtles (Table 2). Furthermore, Turtle 3 returned to nest successfully 11 days later (14 days after the previous nesting), which was her fifth and final nest of the season. A season total of five nests is within the normal range for nesting leatherbacks in this population (see Reina et al., 2002b).

According to Reina et al. (2005), U-dives chiefly serve a resting purpose, and almost 20% of these dives involve the turtles remaining stationary on the ocean bottom for up to 1 min. Furthermore, Southwood et al. (2005) reported decreases in body temperature  $T_b$  during relative inactivity on or near the ocean bottom, indicating physiological heat dissipation. For all turtles in our study, as the number of U-dives that turtles made increased, so did the percentage of time spent in  $T_w \leq 24^\circ\text{C}$  ( $r^2=0.311$ ,  $P=0.016$ ). However, DLW turtles made significantly more U-dives than LTD turtles (Table 2), thus accounting for the increased percentage of time that DLW turtles spent in colder waters than LTD turtles. We hypothesize that the prolonged restraint in cargo nets and sequential blood-drawing procedures caused the experimental turtles to incur elevated corticosteroid levels and increased heat loads, which resulted in protracted internesting periods and compensatory thermoregulatory behavior during the first few days at sea after the experiment. What effects, if any, the experimental stress had on the FMR values themselves is unknown, especially since DLW-derived FMRs are integrations of metabolism during the entire study period, not for particular activities. However, DLW turtles performed within the range of dive variables for all turtles (Table 2), indicating that their diving activities (and presumably their FMRs) were representative of internesting leatherbacks in

general. It is important to point out that DLW turtles returned to nest successfully and also resumed normal internesting periods after the experiment. While the prolonged restraint was necessary and the DLW experiment likely imposed stress on leatherbacks, it did not interfere with their long-term reproduction or behavior. Nonetheless, these factors should be taken into consideration when conducting this type of experiment with marine turtles because of their endangered status and the unavoidably stressful nature of the experiment.

#### FMRs, diving physiology and activity

Our proposed upper limit on leatherback cADL (44.3 min) corroborates the findings of Hays et al. (2004a), who reported an apparent ceiling on leatherback migratory dive durations at around 40 min. Mean dive durations for all four DLW turtles were below the cADL range (11.7–44.3 min), and DLW turtles exceeded their cADL on only 0–33% of their dives (Table 3A). We then calculated the percentage of dives for all 18 turtles exceeding the lower (11.7 min) and upper limits (44.3 min) of the FMR-derived cADLs. All turtles regularly dived below or within the cADL range, and on the average 25% of dives exceeded the lower limit (Table 3B, Fig. 5). Only one dive exceeded the upper limit (44.9 min; Turtle 2), but none exceeded the upper limits proposed by Lutcavage et al. (70 min; 1990) and Southwood et al. (67 min; 1999).

According to Thompson and Fedak (2001), an air-breathing, diving animal should regularly approach and often exceed its ADL when foraging conditions are advantageous, and doing so would allow it to better exploit such conditions. Many marine mammals and birds routinely exceed cADLs while actively foraging (Costa et al., 2001). Conversely, if potential foraging success is low, an animal should limit its energy expenditure and dive well within its ADL. The fact that

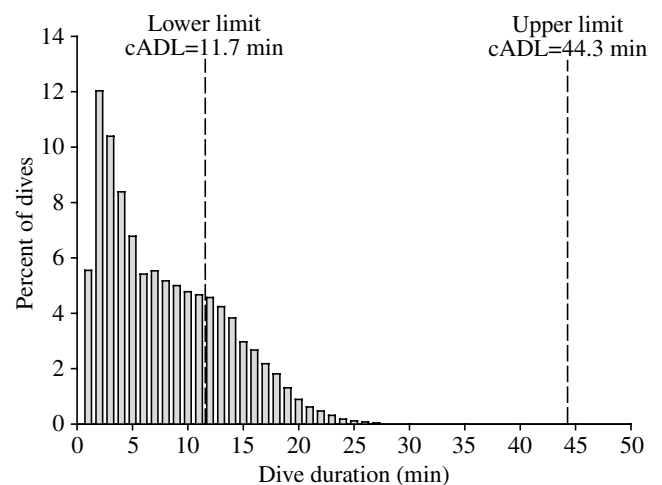

Fig. 5. Frequency distribution of dive durations for all turtles in relation to calculated aerobic dive limits (cADLs). Approximately 43% of all dives were  $\leq 5$  min long, and 25% of all dives exceeded the lower limit of the cADLs (11.7 min) that we calculated from field metabolic rates for free-swimming, internesting leatherbacks. Only one dive duration exceeded the upper limit (44.3 min) of cADLs.

interesting leatherbacks rarely approached their cADL values suggests that prey availability off Parque Nacional Marino Las Baulas was low and turtles were not actively foraging (Thompson and Fedak 2001; Hays et al., 2004a). Considering the weak relationship between dive durations and post-dive surface interval ( $r^2=0.159$ ), these analyses further support the conclusion that interesting leatherbacks maintain relatively low activity levels, conserve energy by diving well-within physiological limits, and are rarely, if ever, anaerobic during the interesting period (Jones et al., 2004).

We found positive relationships between FMRs and mean dive durations, bottom times, surface intervals, and the proportion of time turtles spent in  $T_w \leq 24^\circ\text{C}$  (all  $r^2 > 0.99$ ). These results raise interesting questions about leatherback thermoregulation, diving physiology and behavior. Leatherbacks might dive more actively, thereby increasing metabolic rates (since increased muscle activity automatically results in higher metabolism) in order to exploit colder waters, presumably to forage. Eckert et al. (1986, 1989, 1996) hypothesized that diurnal differences in dive patterns represented foraging activity following the deep-scattering layer (DSL). However, Hays et al. (2004a) pointed out that leatherbacks migrate great distances away from nesting grounds to increase foraging success because prey abundance is presumably greater on pelagic foraging grounds than along tropical coasts. In addition, Reina et al. (2005) did not observe any feeding activity in video footage of the first day after nesting, and Southwood et al. (2005) found no relationship between ingestion events and diel dive patterns, which were previously thought to be related to vertical movements of the DSL (Eckert et al., 1986, 1989, 1996). If leatherbacks were actively foraging, an increase in FMR over RMR of 10–30% might be expected due to specific dynamic action (Withers, 1992). However, the fact that FMRs that we obtained were not significantly elevated relative to nesting leatherback MRs (Fig. 2) renders the possibility that leatherbacks were foraging during the interesting period highly unlikely.

According to the gigantothermy model, leatherbacks must maintain low MRs and increase blood flow to peripheral tissues to dissipate heat generated internally to avoid overheating in the tropics (Paladino et al., 1990). Southwood et al. (2005) recorded subcarapace and gastrointestinal tract temperatures of interesting leatherbacks and surmised that their measured gradients between  $T_b$  and  $T_w$  for leatherbacks in the tropics supported the predictions of the gigantothermy model. While data on blood flow adjustments by leatherbacks at sea are not available, the relatively low FMR values that we report in the present study for interesting leatherbacks reinforce the conclusions of Paladino et al. (1990) and Southwood et al. (2005). Furthermore, we found relationships between FMRs, increased activity levels (mean maximum depth, dive duration, bottom time) and proportion of time spent in  $T_w \leq 24^\circ\text{C}$ . This suggests that leatherbacks with increased activity levels (and perhaps higher metabolic rates) might avoid overheating while in the tropics by increasing the

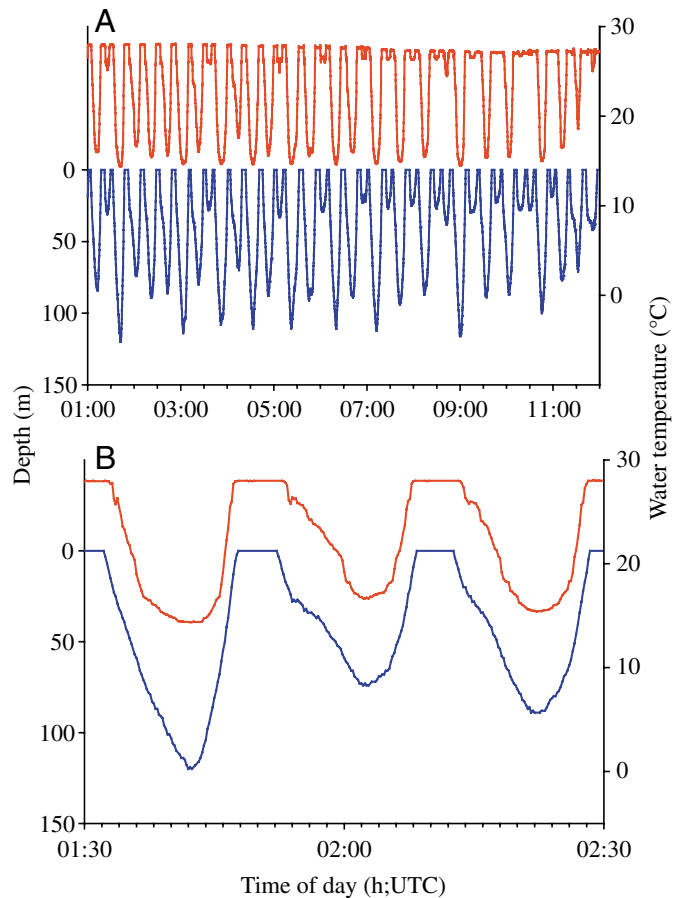

Fig. 6. Depth (blue trace) vs temperature (red trace) diving profiles for (A) 12 h and (B) 1 h. Electronic archival dive data displayed were recorded during day 3 of the interesting period for Turtle 1 and include her deepest dive (120 m), longest dive duration (22.2 min), and coldest water temperature experienced ( $14.4^\circ\text{C}$ ). Water temperatures experienced by Turtle 1 during this 12 h period ranged from  $28.1$  to  $14.4^\circ\text{C}$ .

proportion of time spent in cool water, thus behaviorally moderating their body temperatures by using cooler water as a heat sink (Fig. 6). Southwood et al. (2005) reported  $T_b$  values that were consistently elevated above  $T_w$ , but  $T_b$  could be affected by modifications in swimming and diving activity and fluctuating  $T_w$ . Tuna also experience limitations on activity in warm water in the tropics (Blank et al., 2004), and modulate heat transfer both physiologically and behaviorally (Dewar et al., 1994). Leatherbacks in this study spent the highest percentage of time in cooler waters in the early third of the interesting period after nesting, implying that increased heat loads incurred during increased activity associated with nesting necessitated shuttling to colder  $T_w$ . Southwood et al. (2005) recorded frequent ingestion events during this segment of the interesting period, potentially indicating internal heat dissipation through ingestion of cooler water and/or prey. It is plausible that dive patterns of leatherbacks foraging in cold waters would be opposite to those for interesting leatherbacks, in that turtles might spend

more time at the surface in warmer water in response to prolonged periods submerged in colder water, as documented in bigeye (Holland et al., 1992) and bluefin tuna (Gunn and Block, 2001). Additional experiments simultaneously measuring leatherback body temperatures, metabolism and diving activity in cold water are needed to distinguish between these possibilities.

In order for female leatherbacks to reproduce, they must harvest and store sufficient energy to facilitate nest construction, egg production and survival at sea between nesting events. Of those components, only energy expenditure during the interesting period can be flexible, since compromises in egg production and nest construction would decrease reproductive success. The relatively low FMRs reported here, almost exclusively aerobic diving, and apparent thermal constraints on activity imposed by warm tropical water exhibited by leatherbacks in this study, suggest minimized energy expenditure during the interesting period. This might facilitate increased energy allocation to egg production and nesting, as reported for interesting green turtles (Hays et al., 2000). Future studies should incorporate more data on metabolism, body temperatures and diving behavior of migrating and foraging turtles in cooler waters in order to understand how environmental and life history demands affect marine turtle energetics and activity.

#### List of abbreviations

|                   |                                  |
|-------------------|----------------------------------|
| ADL               | aerobic dive limit               |
| APE               | atom percent excess              |
| cADL              | calculated aerobic dive limit    |
| DLW               | doubly labeled water             |
| DSL               | deep-scattering layer            |
| FMR               | field metabolic rate             |
| $k$               | isotopic washout                 |
| LTD               | light–temperature–depth recorder |
| MR                | metabolic rate                   |
| rCO <sub>2</sub>  | CO <sub>2</sub> production       |
| rH <sub>2</sub> O | water turnover rate              |
| RMR               | resting metabolic rate           |
| SAG               | shelled albumen gob              |
| $T_b$             | body temperature                 |
| $T_w$             | water temperature                |
| TBW               | total body water                 |

We thank R. Piedra, F. Álvarez, R. Corea, J. Carvajal, P. Dutton, G. Shillinger, B. Block, EARTHWATCH volunteers, and the Leatherback Conservation Project's field biologists, especially A. Sieg and R. George. Financial support for this project was from the EARTHWATCH Center for Field Studies, the Betz Chair of Environmental Science at Drexel University, the Schrey Chair of Biology at IPFW, the Leatherback Trust, the Tagging of Pacific Pelagics (TOPP) Program, and the Goldring Family Foundation. The material the work is based upon was supported by a National Science Foundation Graduate Research Fellowship to B.P.W.

#### References

- Aquarone, M. (2004). Body composition, field metabolic rate, and feeding ecology of walrus (*Odobenus rosmarus*) in northeast Greenland. PhD thesis, National Environmental Research Institute, Ministry of the Environment, Denmark.
- Arnould, J. P. Y., Boyd, I. L. and Speakman, J. R. (1996). The relationship between foraging behaviour and energy expenditure in Antarctic fur seals. *J. Zool. Soc. Lond.* **239**, 769–782.
- Bjorndal, K. A. and Jackson, J. B. C. (2003). Roles of sea turtles in marine ecosystems: reconstructing the past. In *The Biology of Sea Turtles*, Vol. 2 (ed. P. L. Lutz, J. A. Musick and J. Wyneken), pp. 259–274. Boca Raton, FL: CRC Press.
- Blank, J. M., Morrisette, J. M., Landeira-Fernandez, A. M., Blackwell, S. B., Williams, T. D. and Block, B. A. (2004). *In situ* cardiac performance of Pacific bluefin tuna hearts in response to acute temperature change. *J. Exp. Biol.* **207**, 881–890.
- Block, B. A., Finnerty, J. R., Stewart, A. F. R. and Kidd, J. (1993). Evolution of endothermy in fish: mapping physiological traits on a molecular phylogeny. *Science* **260**, 210–213.
- Booth, D. T. (2002). The doubly-labeled water technique is impractical for measurement of field metabolic rate in freshwater turtles. *Herp. Rev.* **33**, 105–107.
- Butler, P. J., Green, J. A., Boyd, I. L. and Speakman, J. R. (2004). Measuring metabolic rate in the field: the pros and cons of the doubly labelled water and heart rate methods. *Func. Ecol.* **18**, 168–183.
- Clusella Trullas, S., Spotila, J. R. and Paladino, F. V. (in press). Energetics during hatchling dispersal using doubly labelled water. *Physiol. Biochem. Zool.*
- Costa, D. P. (1988). Methods for studying the energetics of freely diving animals. *Can. J. Zool.* **66**, 45–52.
- Costa, D. P. and Gales, N. J. (2000). Foraging energetics and diving behavior of lactating New Zealand sea lions, *Phocartos hookeri*. *J. Exp. Biol.* **203**, 3655–3665.
- Costa, D. P. and Gales, N. J. (2003). Energetics of a benthic diver: seasonal foraging ecology of the Australian sea lion, *Neophoca cinerea*. *Eco. Monogr.* **73**, 27–43.
- Costa, D. P., Gales, N. J. and Goebel, M. E. (2001). Aerobic dive limit: how often does it occur in nature? *Comp. Biochem. Physiol.* **129A**, 771–783.
- Dewar, H., Graham, J. B. and Brill, R. W. (1994). Studies of tropical tuna swimming performance in a large water tunnel. II. Thermoregulation. *J. Exp. Biol.* **192**, 33–44.
- Eckert, S. A. (2002). Swim speed and movement patterns of gravid leatherback sea turtles (*Dermochelys coriacea*) at St Croix, US Virgin Islands. *J. Exp. Biol.* **205**, 3689–3697.
- Eckert, S. A., Nellis, D. W., Eckert, K. L. and Kooyman, G. L. (1986). Diving patterns of two leatherback sea turtles (*Dermochelys coriacea*) during interesting intervals at Sandy Point, St Croix, U.S. Virgin Islands. *Herpetologica* **42**, 381–388.
- Eckert, S. A., Eckert, K. L., Ponganis, P. and Kooyman, G. L. (1989). Diving and foraging behavior of leatherback sea turtles (*Dermochelys coriacea*). *Can. J. Zool.* **67**, 2834–2840.
- Eckert, S. A., Liew, H. C., Eckert, K. L. and Chan, E. H. (1996). Shallow water diving by leatherback turtles in the South China Sea. *Chel. Cons. Biol.* **2**, 237–243.
- Ferraro, S., Georges, J. Y., Gaspar, P. and Maho, Y. L. (2004). Where leatherback turtles meet fisheries. *Nature* **429**, 521–522.
- Frair, W., Ackman, R. G. and Mrosovsky, N. (1972). Body temperature of *Dermochelys coriacea*: warm turtle from cold water. *Science* **177**, 791–793.
- Goff, G. P. and Lien, J. (1988). Atlantic leatherback turtles, *Dermochelys coriacea*, in cold water off Newfoundland and Labrador. *Can. Field Nat.* **102**, 1–5.
- Greer, A. E., Lazell, J. D. and Wright, R. M. (1973). Anatomical evidence for a countercurrent heat exchanger in the leatherback turtle (*Dermochelys coriacea*). *Nature* **244**, 181.
- Gregory, L. F. and Schmid, J. R. (2001). Stress responses and sexing of wild Kemp's ridley (*Lepidochelys kempii*) in the northwestern Gulf of Mexico. *Gen. Comp. Endocrinol.* **124**, 66–74.
- Gunn, J. S. and Block, B. A. (2001). Advances in acoustic, archival, and satellite tagging of tunas. In *Tuna: Physiology, Ecology, and Evolution* (ed. B. A. Block and E. D. Stevens), pp. 167–224. San Diego, CA: Academic Press.
- Hays, G. C., Adams, C. R., Broderick, A. C., Godley, B. J., Lucas, D. J., Metcalfe, J. D. and Prior, A. A. (2000). The diving behaviour of green turtles at Ascension Island. *Anim. Behav.* **59**, 577–586.



- Hays, G. C., Houghton, J. D. R., Isaacs, C., King, R. S., Lloyd, C. and Lovell, P. (2004a). First oceanic dive profiles for leatherback turtles, *Dermochelys coriacea*, indicate behavioural plasticity associated with long-distance migration. *Anim. Behav.* **67**, 733-743.
- Hays, G. C., Houghton, J. D. R. and Myers, A. E. (2004b). Pan-Atlantic leatherback turtle movements. *Nature* **429**, 522.
- Holland, K. N., Brill, R. W., Chang, R. K. C., Sibert, J. R. and Fournier, D. A. (1992). Physiological and behavioural thermoregulation in bigeye tuna (*Thunnus obesus*). *Nature* **35**, 410-411.
- Jackson, D. C. (1985). Respiration and respiratory control in the green turtle, *Chelonia mydas*. *Copeia* **1985**, 664-671.
- Jacobson, E., Bjørndal, K., Bolten, A., Herren, R., Harman, G. and Wood, L. Establishing plasma biochemical and hematocrit reference intervals for sea turtles in Florida. [http://accstr.ufl.edu/blood\_chem.htm].
- Jones, D. R., Southwood, A. L. and Andrews, R. D. (2004). Energetics of leatherback sea turtles: a step toward conservation. In *Experimental Approaches to Conservation Biology* (ed. M. S. Gordon and S. M. Bartol), pp. 66-82. Berkeley, CA: University of California Press.
- Jones, T. T., Hastings, M., Andrews, R. and Jones, D. R. (in press). Validation of the use of doubly labeled water in the green turtle (*Chelonia mydas*): measurements of body water, water turnover, and metabolism. Proceedings from the 25<sup>th</sup> Annual International Symposium on Sea Turtle Conservation and Biology. Savannah, GA, USA.
- Kooyman, G. L., Wahrenbrock, E. A., Castellini, M. A., Davis, R. W. and Sinnett, E. E. (1980). Aerobic and anaerobic metabolism during voluntary diving in Weddell seals: evidence of preferred pathways from blood chemistry and behavior. *J. Comp. Physiol. B* **138**, 335-346.
- Lifson, N., Gordon, G. B. and McClintock, R. (1955). Measurement of total carbon dioxide production by means of D<sub>2</sub>O<sup>18</sup>. *J. Appl. Physiol.* **7**, 704-710.
- Lutcavage, M. E., Bushnell, P. G. and Jones, D. R. (1990). Oxygen transport in the leatherback sea turtle *Dermochelys coriacea*. *Physiol. Zool.* **63**, 1012-1024.
- Lutcavage, M. E., Bushnell, P. G. and Jones, D. R. (1992). Oxygen stores and aerobic metabolism in the leatherback sea turtle. *Can. J. Zool.* **70**, 348-351.
- Miller, J. D. (1997). Reproduction in sea turtles. In *The Biology of Sea Turtles* (ed. P. L. Lutz and J. A. Musick), pp. 51-82. Boca Raton, FL: CRC Press.
- Miton, S. L. and Lutz, P. L. (2003). Physiological and genetic responses to environmental stress. In *The Biology of Sea Turtles*, Vol. 2 (ed. P. L. Lutz, J. A. Musick and J. Wyneken), pp. 163-197. Boca Raton, FL: CRC Press.
- Morreale, S. J. (1999). Oceanic migrations of sea turtles. PhD dissertation, Cornell University, Ithaca, NY, USA.
- Morreale, S. J., Standora, E. A., Spotila, J. R. and Paladino, F. V. (1996). Migration corridor for sea turtles. *Nature* **384**, 319-320.
- Ortiz, R. M., Patterson, R. M., Wade, C. E. and Byers, F. M. (2001). Effects of acute fresh water exposure on water flux rates and osmotic responses in Kemp's ridley sea turtles (*Lepidochelys kempii*). *Comp. Biochem. Physiol.* **127A**, 81-87.
- Owens, D. W. (1997). Hormones in the life history of sea turtles. In *The Biology of Sea Turtles* (ed. P. L. Lutz and J. A. Musick), pp. 315-342. Boca Raton, FL: CRC Press.
- Owens, D. W. and Ruiz, G. J. (1980). New methods of obtaining blood and cerebrospinal fluid from marine turtles. *Herpetologica* **36**, 17-20.
- Paladino, F. V., O'Connor, M. P. and Spotila, J. R. (1990). Metabolism of leatherback turtles, gigantothermy, and thermoregulation of dinosaurs. *Nature* **344**, 858-860.
- Paladino, F. V., Spotila, J. R., O'Connor, M. P. and Gatten, R. E., Jr (1996). Respiratory physiology of adult leatherback turtles (*Dermochelys coriacea*) while nesting on land. *Chel. Cons. Biol.* **2**, 223-229.
- Penick, D. N. (1996). Thermoregulatory physiology of leatherback (*Dermochelys coriacea*) green sea turtles (*Chelonia mydas*). PhD dissertation, Drexel University, Philadelphia, PA, USA.
- Plotkin, P. (2003). Adult migrations and habitat use. In *The Biology of Sea Turtles*, Vol. 2 (ed. P. L. Lutz, J. A. Musick and J. Wyneken), pp. 225-242. Boca Raton, FL: CRC Press.
- Prange, H. D. and Jackson, D. C. (1976). Ventilation, gas exchange and metabolic scaling of a sea turtle. *Resp. Physiol.* **27**, 369-377.
- Reina, R. D. (2000). Salt gland blood flow in the hatchling green turtle, *Chelonia mydas*. *J. Comp. Physiol. B* **170**, 573-580.
- Reina, R. D., Abernathy, K. J., Marshall, G. J. and Spotila, J. R. (2005). Respiratory frequency, dive behavior and social interactions of leatherback turtles, *Dermochelys coriacea* during the inter-nesting interval. *J. Exp. Marine Biol. Ecol.* **316**, 1-16.
- Reina, R. D., Jones, T. T. and Spotila, J. R. (2002a). Salt and water regulation by the leatherback sea turtle *Dermochelys coriacea*. *J. Exp. Biol.* **205**, 1853-1860.
- Reina, R. D., Mayor, P. A., Spotila, J. R., Piedra, R. and Paladino, F. V. (2002b). Nesting ecology of the leatherback turtle, *Dermochelys coriacea*, at Parque Nacional Marino Las Baulas, Costa Rica: 1988-1989 to 1999-2000. *Copeia* **2002**, 653-664.
- Rostal, D. C., Grumbles, J. S., Palmer, K. S., Lance, V. A., Spotila, J. R. and Paladino, F. V. (2001). Changes in gonadal and adrenal steroid levels in the leatherback sea turtle (*Dermochelys coriacea*) during the nesting cycle. *Gen. Comp. Endocrinol.* **122**, 139-147.
- Schmidt-Nielsen, S. (1972). Locomotion: energy cost of swimming, flying, and running. *Science* **177**, 222-227.
- Southwood, A. L., Andrews, R. D., Lutcavage, M. E., Paladino, F. V., West, N. H., George, R. H. and Jones, D. R. (1999). Heart rates and diving behavior of leatherback sea turtles in the Eastern Pacific Ocean. *J. Exp. Biol.* **202**, 1115-1125.
- Southwood, A. L., Andrews, R. D., Paladino, F. V. and Jones, D. R. (2005). Effects of swimming and diving behavior on body temperatures of Pacific leatherbacks in tropical seas. *Physiol. Biochem. Zool.* **78**, 285-297.
- Speakman, J. R. (1997). *Doubly Labelled Water: Theory and Practice*. London: Chapman & Hall.
- Spotila, J. R., Reina, R. D., Steyermark, A. C., Plotkin, P. T. and Paladino, F. V. (2000). Pacific leatherback turtles face extinction. *Nature* **405**, 529-530.
- Thompson, D. and Fedak, M. A. (2001). How long should a dive last? A simple model of foraging decisions by breath-hold divers in a patchy environment. *Anim. Behav.* **61**, 287-296.
- Wallace, B. P., Sotherland, P. R., Spotila, J. R., Reina, R. D., Franks, B. R. and Paladino, F. V. (2004). Biotic and abiotic factors affect the nest environment of embryonic leatherback turtles, *Dermochelys coriacea*. *Physiol. Biochem. Zool.* **77**, 423-432.
- Withers, P. C. (1992). *Comparative Animal Physiology*. Orlando, FL: Saunders College Publishing, Harcourt Brace Jovanovich Publishers.
- Zug, G. R. and Parham, J. F. (1996). Age and growth in leatherback turtles, *Dermochelys coriacea* (Testudines: Dermochelyidae): a skeletochronological analysis. *Chel. Cons. Biol.* **2**, 244-249.
